# Supplementary material for: Double-shell SnO2/CeO2:Yb,Er hollow nanospheres as an assistant layer that suppresses charge recombination in dye-sensitized solar cells
Source: Royal Society of Chemistry journal article supplement (doi:10.1039/c8nj02293c), 2018-01-01
Supplement: c8nj02293c1.pdf [file c8nj02293c1.pdf]

## Supporting Information

Rongfang Zhao<sup>a,b</sup>, Dongmei Tang<sup>a</sup>, Qianhui Wu<sup>a</sup>, Wenlong Li<sup>a</sup>, Xiue Zhang<sup>a</sup>, Rong  
Guo<sup>a</sup>, Ming Chen<sup>a\*</sup>, Guowang Diao<sup>a\*</sup>

<sup>a</sup>School of Chemistry and Chemical Engineering, Yangzhou University, Yangzhou  
225002, P. R. China.

<sup>b</sup>Yantai Institute of Coastal Zone Research, Chinese Academy of Sciences, Yantai  
264003, China.

Corresponding authors: chenming@yzu.edu.cn, gw-diao@yzu.edu.cn

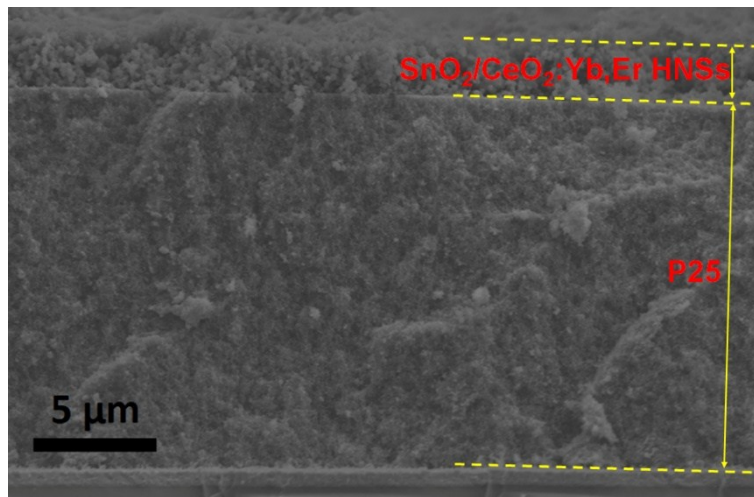

**Figure S1** SEM image of the composite photoanode.

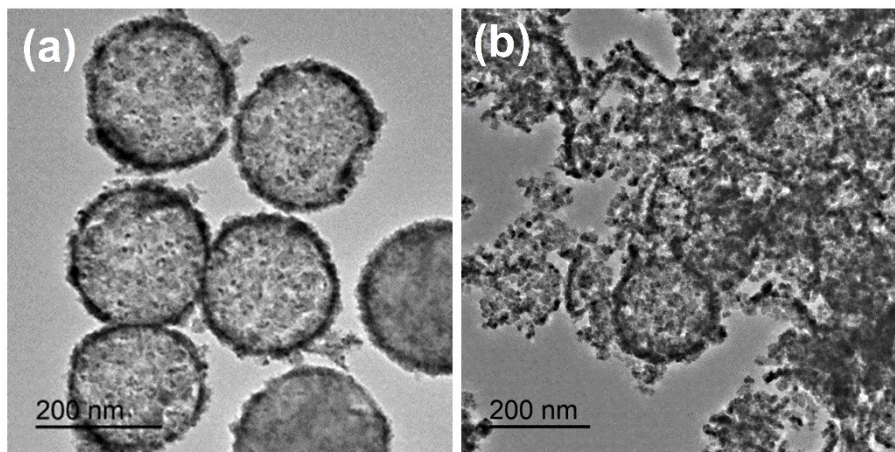

**Figure S2** TEM images of (a) SnO<sub>2</sub>/CeO<sub>2</sub>:Yb,Er HNSs and (b) CeO<sub>2</sub>:Yb,Er.

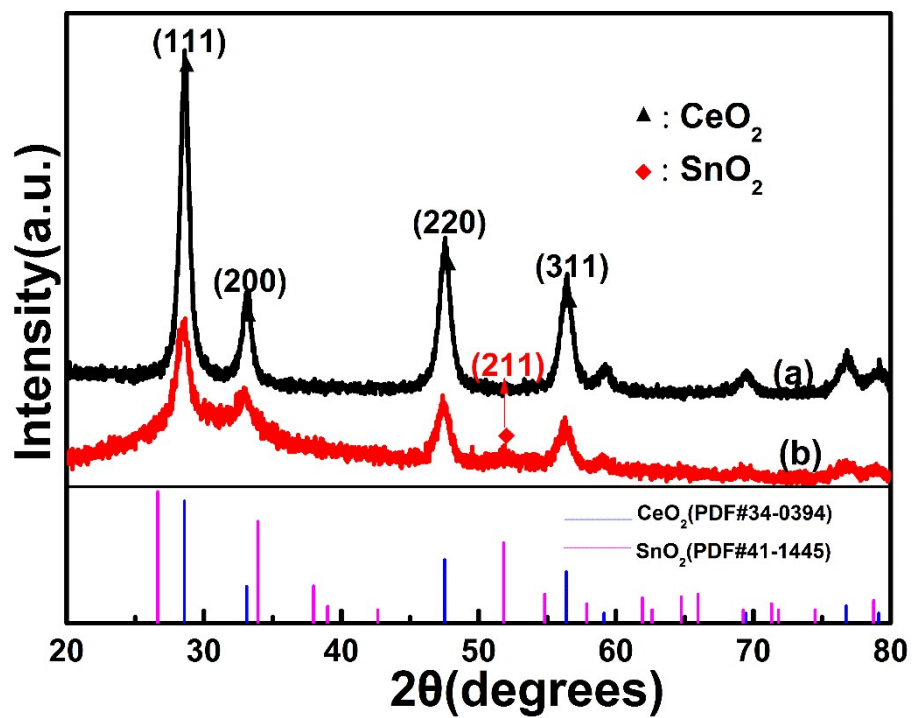

Figure S3 XRD spectra of (a)  $\text{CeO}_2:\text{Yb,Er}$ , (b)  $\text{SnO}_2/\text{CeO}_2:\text{Yb,Er}$  HNSs.

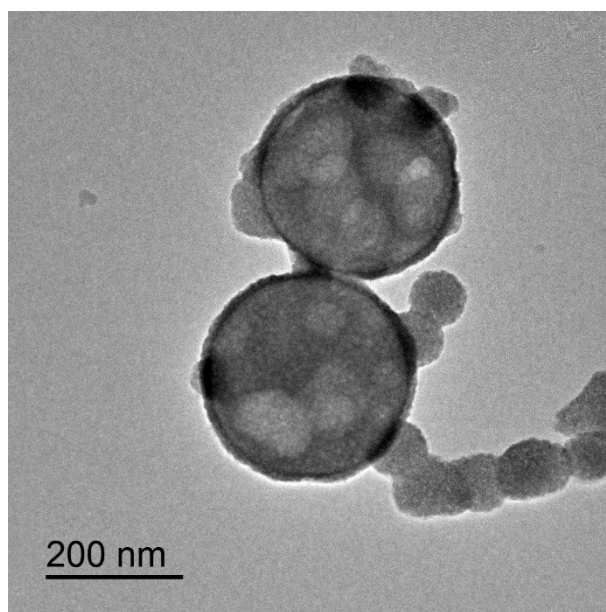

Figure S4 TEM image of  $\text{SnO}_2$  HNSs.

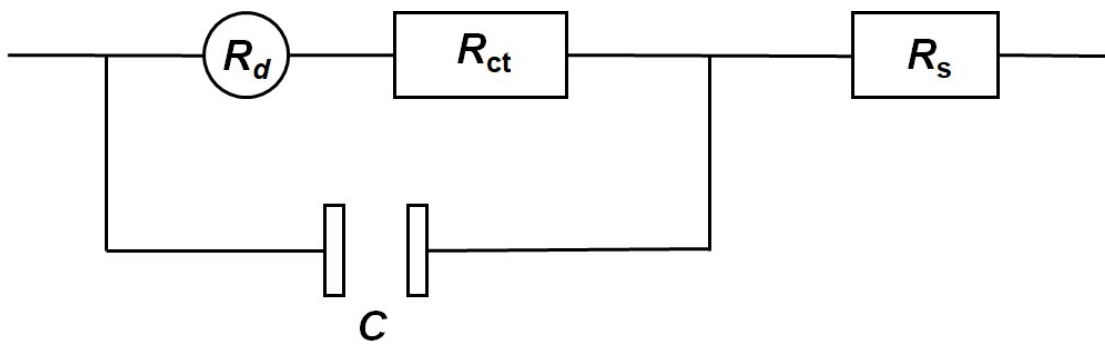

**Figure S5** The equivalent circuit of the DSSCs.
